# Supplementary material
Source: Springer Nature journal article supplement (https://www.springermedizin.de/resource/supplementary/12960_2007_123_MOESM1_ESM.pdf/9570460)

# National EPI Vaccination Rate

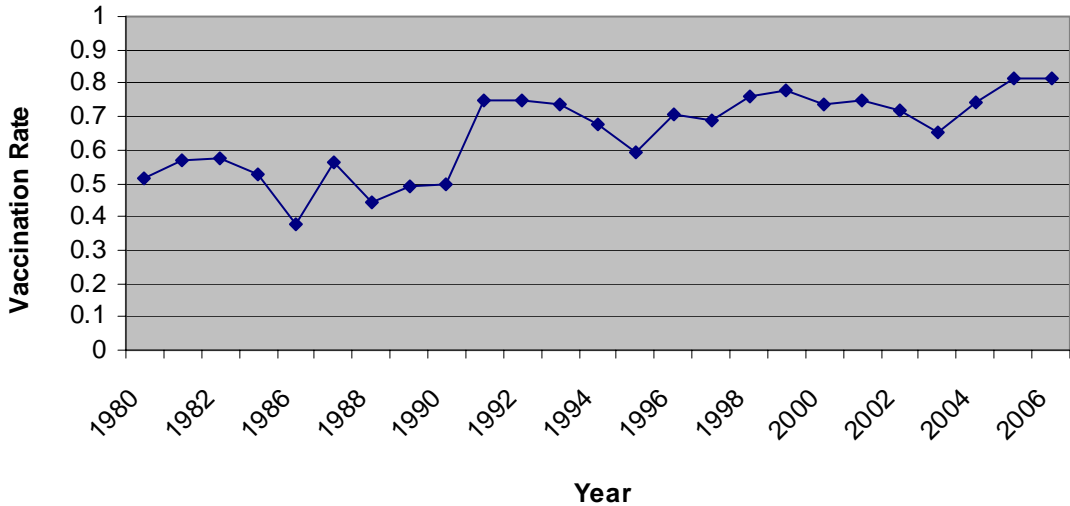

Supplement: MOESM1 [file 9570460]
